# Supplementary material
Source: publisher figshare collection journal article supplement (https://karger.figshare.com/ndownloader/files/30750211)
Supplement: Supplementary file 1 [file 30750211]

|  | ***Total*** | ***Non- Responder: ≤ 0 %*Body weight loss** | ***Responder:  0-4.9 %*Body weight loss** | ***Responder: 5-9.9 %*Body weight loss** | ***Responder:  ≥ 10 %*Body weight loss** | ***Non-Completer*** |
| --- | --- | --- | --- | --- | --- | --- |
| **Total** |  |  |  |  |  |  |
| **NPP (%)** | 267 (100) | 93 (35) | 115 (43) | 42 (16) | 16 (6) | 23 (-) |
| **∆Body weightPP [kg]** | - 2.4 | 3.3 | - 2.8 | - 8.5 | - 16.7 | n.d. |
| **Mean BMIPP ***  Overweight n (%)  Class I obesity n (%)  Class II obesity n (%)  Class III obesity n (%) | 42.7  2 (1)  12 (4)  81 (30)  171 (64) | 43.1  0 (0)  5 (5)  26 (28)  62 (67) | 42.3  0 (0)  5 (4)  39 (34)  71 (62) | 42.3  2 (5)  1 (2)  13 (31)  26 (62) | 43.7  0 (0)  1 (6)  3 (19)  12 (75) | 44.0  0 (0)  2 (9)  3 (13)  18 (78) |
| **NITT (%)** | 297 (100) | 110 (37) | 124 (42) | 45 (15) | 18 (6) | 23 (-) |
| **∆Body weightITT [kg]** | -2.3 | 3.1 | -2.7 | -8.5 | -16.3 | 0.6 |
| **NEG group** |  |  |  |  |  |  |
| **NPP (%)** | 100 (100) | 21 (21) | 49 (49) | 19 (19) | 11 (11) | 8 (-) |
| **∆Body weightPP [kg]** | - 4.5 | 2.7 | - 3.3 | - 8.8 | - 16.6 | n.d. |
| **Mean BMIPP ***  Overweight n (%)  Class I obesity n (%)  Class II obesity n (%)  Class III obesity n (%) | 42.2  2 (2)  6 (6)  33 (33)  59 (59) | 42.3  0 (0)  1 (5)  9 (43)  11 (52) | 42.1  0 (0)  4 (8)  17 (35)  28 (57) | 41.4  2 (11)  0 (0)  5 (26)  12 (63) | 43.7  0 (0)  1 (9)  2 (18)  8 (73) | 42.0  0 (0)  1 (13)  1 (13)  6 (74) |
| **NITT (%)** | 113 (100) | 27 (24) | 52 (46) | 22 (19) | 12 (11) | 8 (-) |
| **∆Body weightITT [kg]** | - 4.3 | 2.3 | - 3.1 | - 8.7 | - 16.4 | - 0.1 |
| **POS group** |  |  |  |  |  |  |
| **NPP (%)** | 105 (100) | 46 (44) | 42 (40) | 14 (13) | 3 (3) | 4 (-) |
| **∆Body weightPP [kg]** | - 0.6 | 4.2 | - 2.2 | - 8.5 | - 15.1 | n.d. |
| **Mean BMIPP ***  Class I obesity n (%)  Class II obesity n (%)  Class III obesity n (%) | 43.4  4 (4)  28 (27)  73 (69) | 44.0  2 (4)  8 (17)  36 (78) | 42.4  1 (2)  15 (36)  26 (62) | 43.8  1 (7)  4 (29)  9 (64) | 43.3  0 (0)  1 (33)  2 (67) | 48.1  0 (0)  0 (0)  4 (100) |
| **NITT (%)** | 111 (100) | 51 (46) | 43 (39) | 14 (13) | 3 (3) | 4 (-) |
| **∆Body weightPP [kg]** | - 0.4 | 4.2 | - 2.1 | - 8.5 | - 15.1 | 4.6 |

**Table S1**. Body weight change

**Abbreviations**: ∆Body weight=change in body weight;BMI=Body Mass Index; Class I obesity = BMI of 30-34.9 kg/m2; Class II obesity = BMI of 35-39.9 kg/m2; Class III obesity = BMI of ≥ 40 kg/m2; ITT= Intention to treat population; N=sample size; NEG group=participants who had a negative attitude towards bariatric surgery; n.d.= no data; Non-Completer=<80% participation in the program; Non-Responder=no body weight loss or body weight gain during intervention; PP=Per Protocol Population; POS group=participants who had a positive attitude towards bariatric surgery; Responder=body weight loss (<0kg) during intervention; Overweight= BMI of 25-29.9 kg/m2;*data from Per-Protocol-population.
